# Supplementary material for: Applying compressed sensing to genome-wide association studies
Source: Springer Nature journal article supplement (doi:10.1186/2047-217x-3-10), 2014-06-16

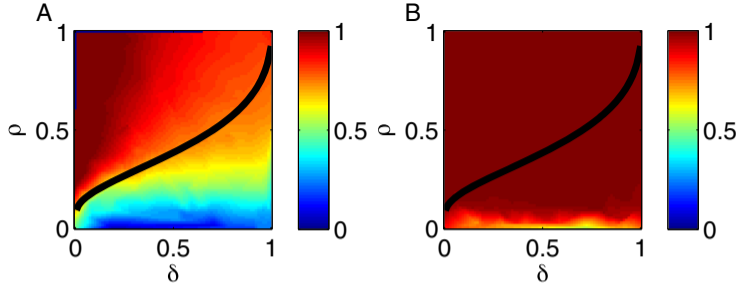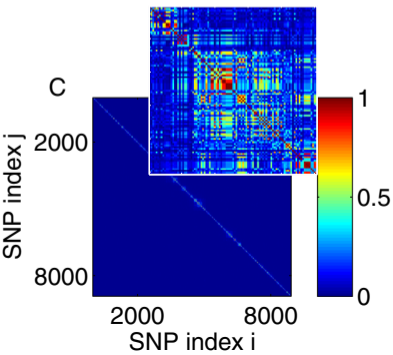

Supplement: 13742_2014_43_MOESM3_ESM.pdf [file 13742_2014_43_MOESM3_ESM.pdf]
