# Supplementary material for: Applying compressed sensing to genome-wide association studies
Source: Springer Nature journal article supplement (doi:10.1186/2047-217x-3-10), 2014-06-16
Supplement: 13742_2014_43_MOESM6_ESM.pdf [file 13742_2014_43_MOESM6_ESM.pdf]

0

SNP index j

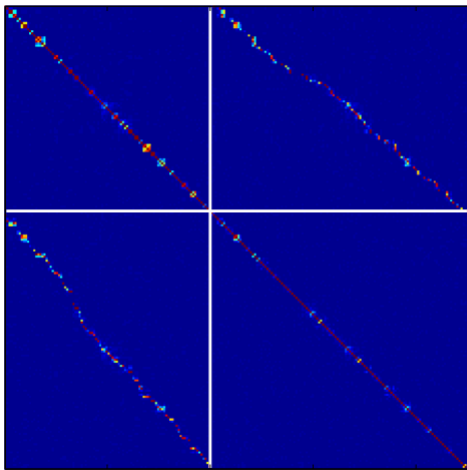

SNP index i

1

0.9

0.8

0.7

0.6

0.5

0.4

0.3

0.2

0.1

0
